# Supplementary material for: Grounded ridge detection and characterization along the Alaska Arctic coastline using ICESat-2 surface height retrievals
Source: Copernicus journal article supplement (doi:10.5194/tc-19-2045-2025), 2025-06-11
Supplement: Supplementary file 1 [file tc-19-2045-2025-supplement.zip]

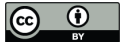

*Supplement of*

**Grounded ridge detection and characterization along the Alaska Arctic coastline using ICESat-2 surface height retrievals**

**Kennedy A. Lange et al.**

*Correspondence to:* Alice C. Bradley ([alice.c.bradley@williams.edu](mailto:alice.c.bradley@williams.edu))

- `tc-19-2045-2025-supplement-title-page.pdf`
- `HighConfidenceRidges.csv`
- `LowConfidenceRidges.csv`
- `MediumConfidenceRidges.csv`

The copyright of individual parts of the supplement might differ from the article licence.
